# Supplementary material
Source: PubMed Central journal article supplement (PMC7583042)
Supplement: NIHMS1637515-supplement-1.pdf [file NIHMS1637515-supplement-1.pdf]

**Supplemental Table 1.** Summary of data reduction and refinement statistics

| Compound                         | 4 at 1 hour of soaking          | 4 at 2 hours of soaking          | 4 at 4 hours of soaking          |
|----------------------------------|---------------------------------|----------------------------------|----------------------------------|
| PDB code                         | 6RTJ                            | 6RTM                             | 6RTO                             |
| <b>Data reduction statistics</b> |                                 |                                  |                                  |
| Space group                      | C2                              | C2                               | C2                               |
| Unit cell dimensions (Å)         | 142.66 102.19 58.52<br>β=112.89 | 142.04 102.00 58.540<br>β=112.78 | 142.27 102.00 58.47<br>β= 112.57 |
| Resolution range (Å)             | 40.6-2.06 (2.05-2.00)           | 40.6-2.10 (2.16-2.10)            | 39.6-2.30 (2.38-2.30)            |
| mean I/sigma(I)                  | 13.9(2.0)                       | 16.1 (1.9)                       | 12.8 (1.9)                       |
| Completeness (%)                 | 99.8(98.7)                      | 98.7 (97.6)                      | 99.8(100)                        |
| CC1/2                            | 99.8(70.7)                      | 99.9(68.0)                       | 99.8(69.0)                       |
| Rmerge (%)                       | 5.6(63.9)                       | 6.2 (62.7)                       | 6.2 (62.8)                       |
| Number of unique reflections     | 51649(3788)                     | 44319 (3577)                     | 34230 (3357)                     |
| <b>REFINEMENT STATISTICS</b>     |                                 |                                  |                                  |
| Resolution range (Å)             | 39.8-2.0(2.03-2.0)              | 40.6-2.1(2.14-2.10)              | 37.1-2.3(2.36-2.30)              |
| No. reflections                  | 51628 (2562)                    | 44285(2560)                      | 34224 (2710)                     |
| R/Rfree                          | 0.18/0.22(0.25/0.28)            | 0.18/0.23(0.25/0.32)             | 0.19/0.24(0.26/0.35)             |
| Mean B-factor                    | 30.0                            | 34.5                             | 41.5                             |
| RMS bond lengths deviations      | 0.012                           | 0.012                            | 0.015                            |
| RMS bond angles deviation        | 1.131                           | 1.150                            | 1.432                            |
| <b>RAMACHANDRAN (%)</b>          |                                 |                                  |                                  |
| Favored                          | 96.2                            | 96.4                             | 94.9                             |
| Allowed                          | 3.7                             | 3.6                              | 4.8                              |
| Disallowed                       | 0                               | 0                                | 0.3                              |

\*Values given in parentheses refer to highest resolution shell.

## Supplemental figure 1

RP-HPLC and tandem mass spectrometry analysis of the mixture between **1** and Sec at pH 7.4 are reported. The peak relative to the new species, formed after 1 hour of incubation of the reagents, has been manually collected after elution from the C18 column and injected, after 48h days, into a Orbitrap XL Discovery, equipped with a nanoelectrospray source (Thermo Fisher Scientific). ESI-MS/MS analysis was performed in positive ion mode. The oQM-Sec adduct [ $m/z = 326$ ] is the most present species together with the oQM-TCEP adduct [ $m/z = 407$ ] and the intact **1** [ $m/z = 244$ ]. The peak at 326m/z has been subjected to further fragmentation, confirming its chemical composition as reported in the mass spectrum at the bottom of the figure.

**1**+Selenocystine (1h incubation at pH 7.4)  
in presence of 6eq of TCEP

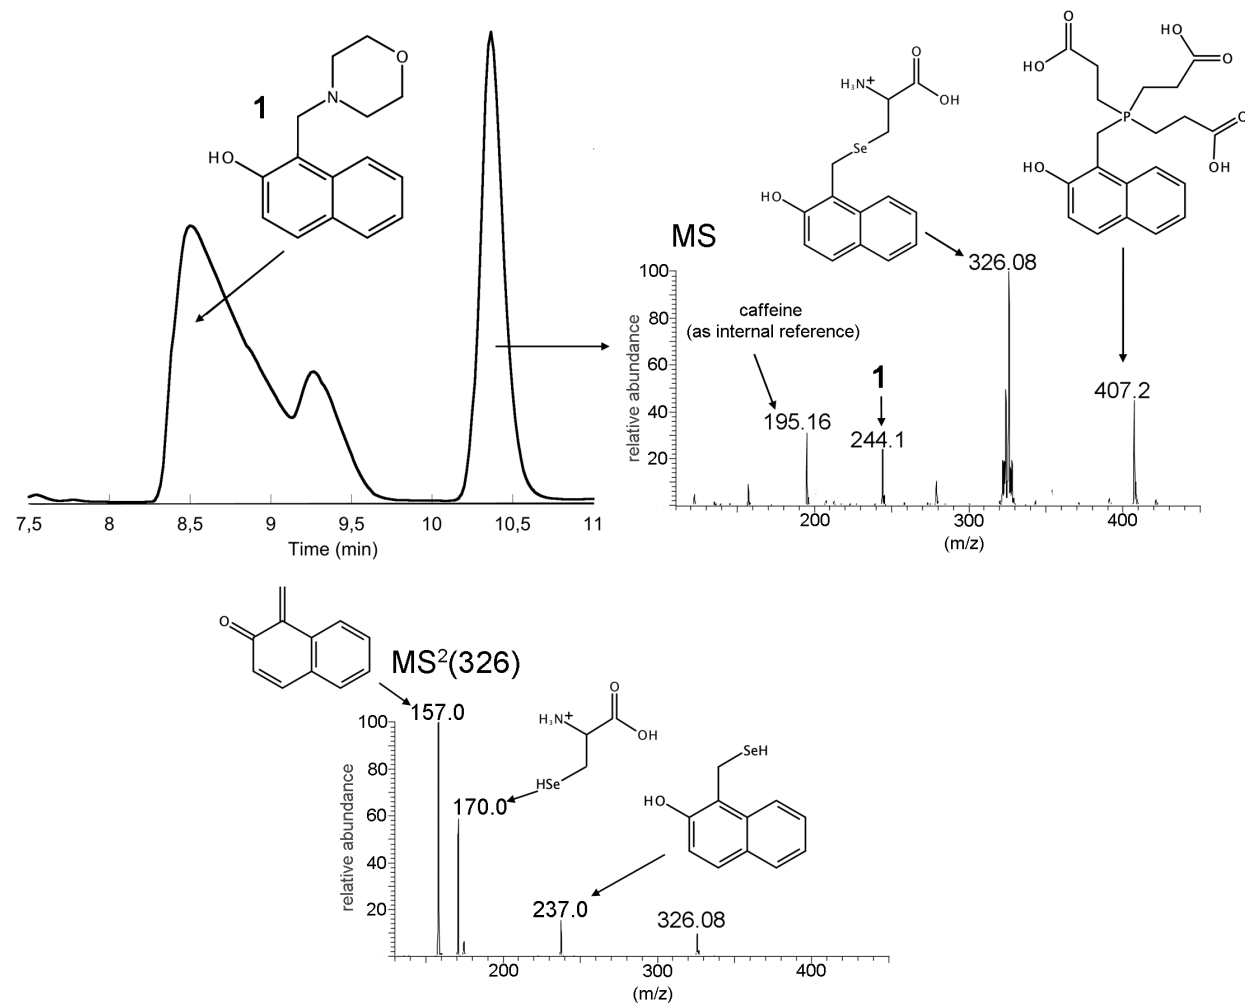

## Supplemental figure 2

An analysis of the distances between SmtTGR and compound **4** (LIG) during the 20 ns (2000 frames) production trajectory for pairs Glu330 - N-LIG , Asp334 - N-LIG , Glu337 - N-LIG , Asp334 - O-LIG , Glu337 - O-LIG , Lys345 - C5-LIG , Glu337 - Lys345 , Glu330 - Asp334 , Asp334 - Glu337, where N-LIG, O-LIG, and C9-LIG correspond to the nitrogen and oxygen atoms in the substituents and C9 of the naphthyl ring of compound **1**, respectively. In amino acids, the distances were measured using the carbon atoms in the carboxyl groups of the sidechains in E330, D334, and E337 and nitrogen atom in the sidechains of K345.

| Distance between: | Average distance, Å |
|-------------------|---------------------|
| Lys345-N-LIG      | 5.56                |
| Glu330-N-LIG      | 5.64                |
| Asp334-N-LIG      | 7.28                |
| Glu337-N-LIG      | 7.15                |
| Glu330-O-LIG      | 6.38                |
| Asp334-O-LIG      | 5.09                |
| Glu337-O-LIG      | 5.19                |
| Lys345-C9-LIG     | 4.9                 |
| Glu330-Lys345     | 10.5                |
| Asp334-Lys345     | 8.97                |
| Glu337-Lys345     | 3.96                |
| Glu330-Asp334     | 7.97                |
| Asp334-Glu337     | 6.9                 |

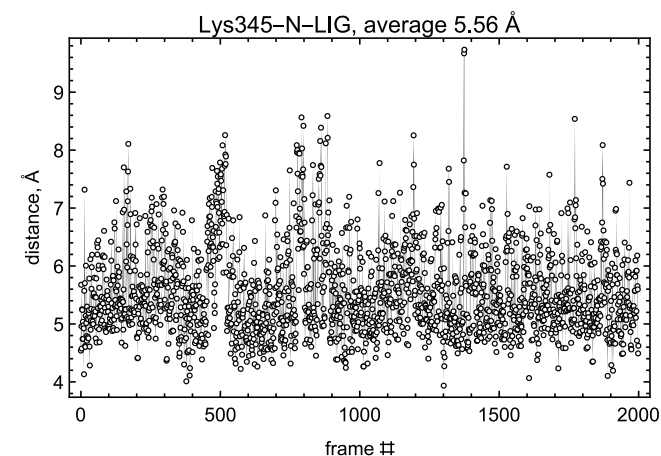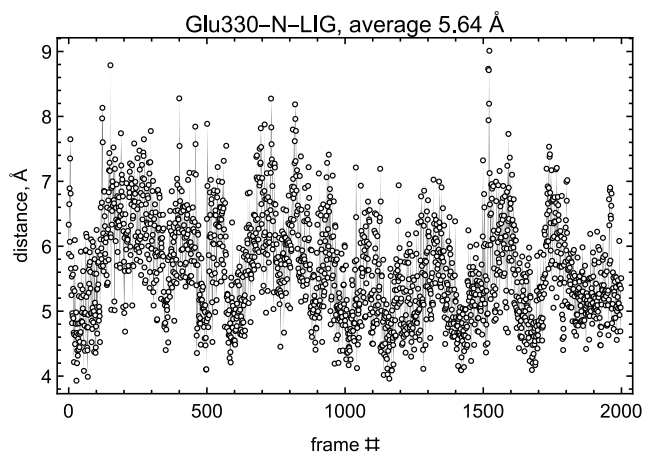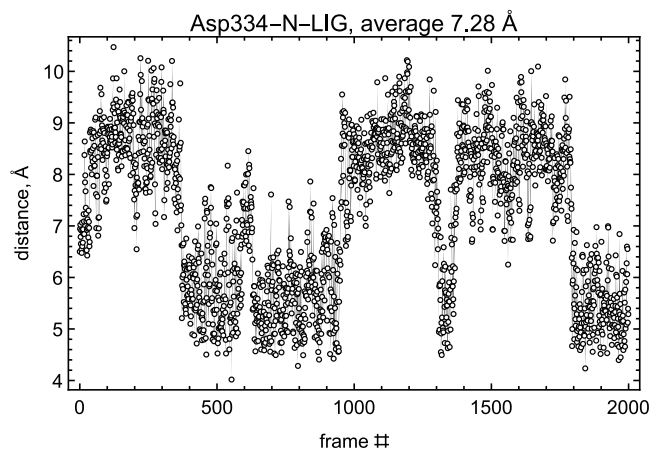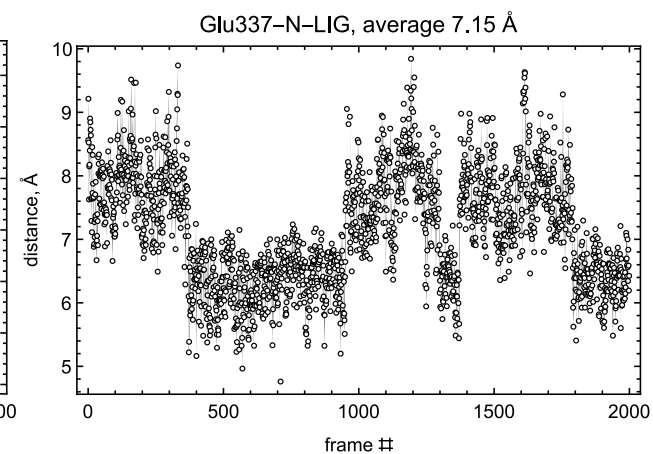

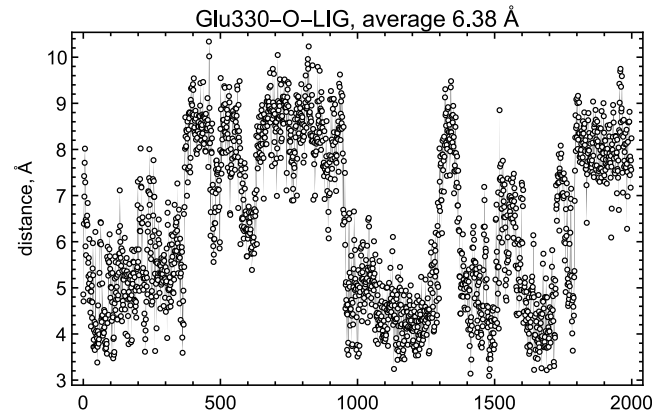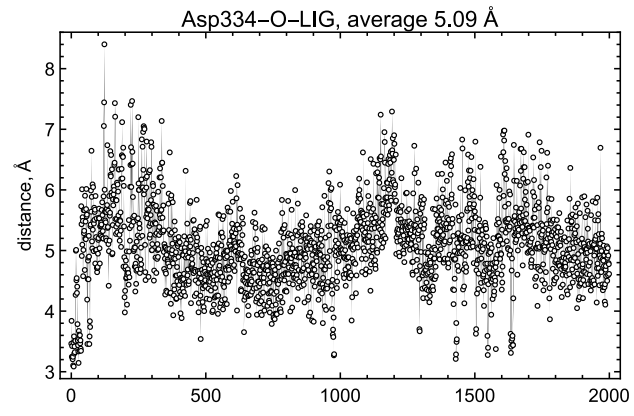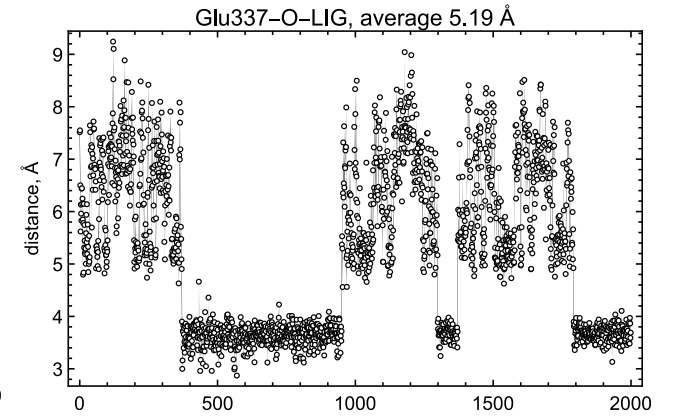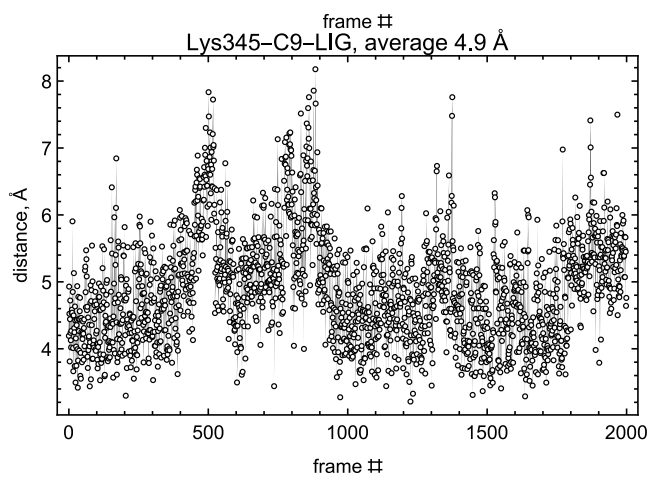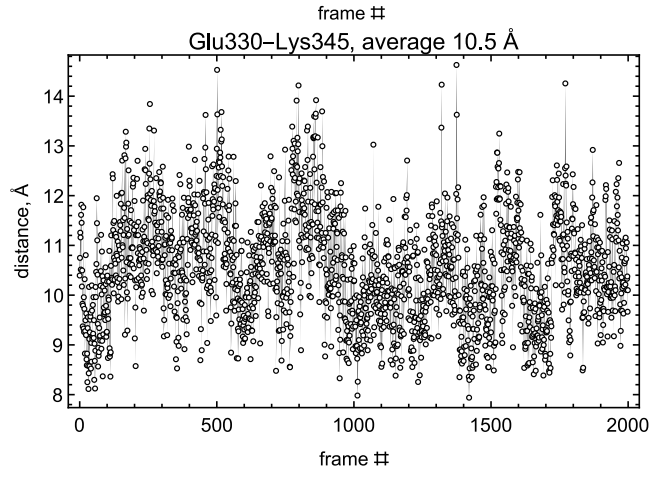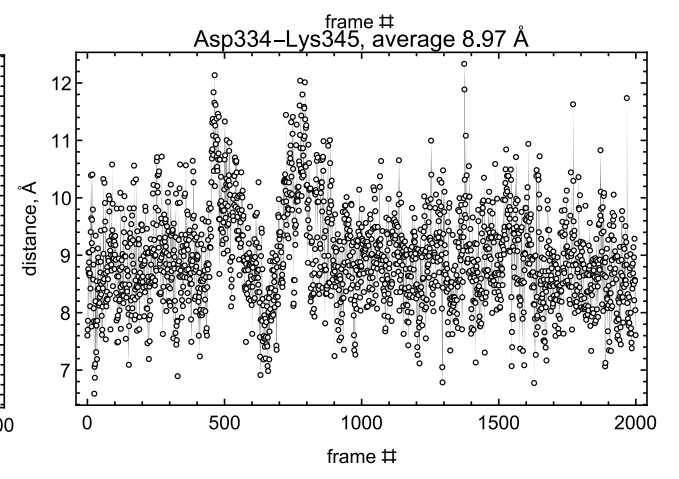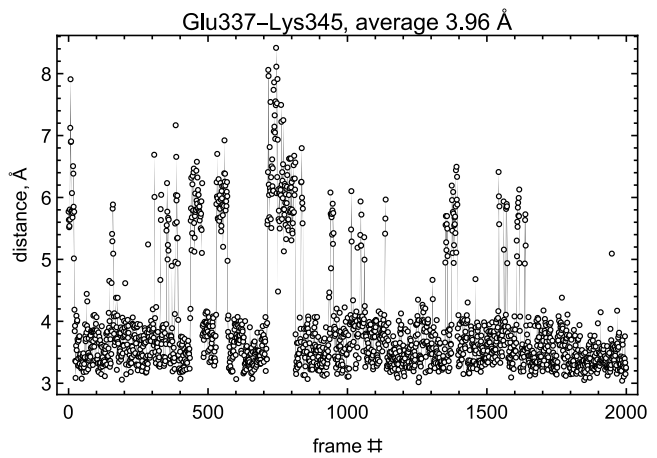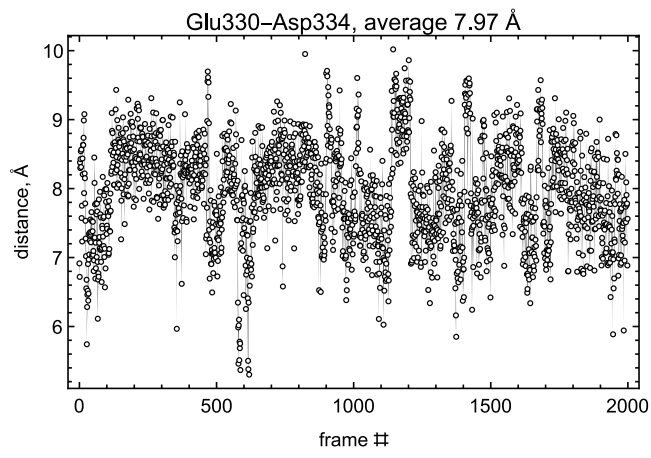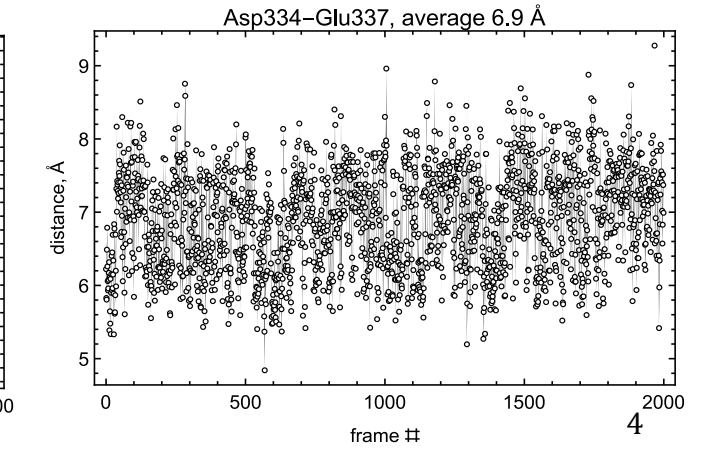

### Supplemental figure 3

The possible sites reached by the C-terminal tail are mapped onto the solvent exposed surface of the SmTGR. The hydrophobic and hydrophilic regions are colored in green and purple, respectively. The Sec-containing C-terminal tail is displayed in spheres and the relevant redox sites (C154/C159 of the FAD redox site; C28/C31 of the Grx redox site; W210 of the Trx docking site) together with the 2NAMO binding site are circled in red. The K585/K586 couple, working as a hinge for the C-terminal movements, is also indicated.

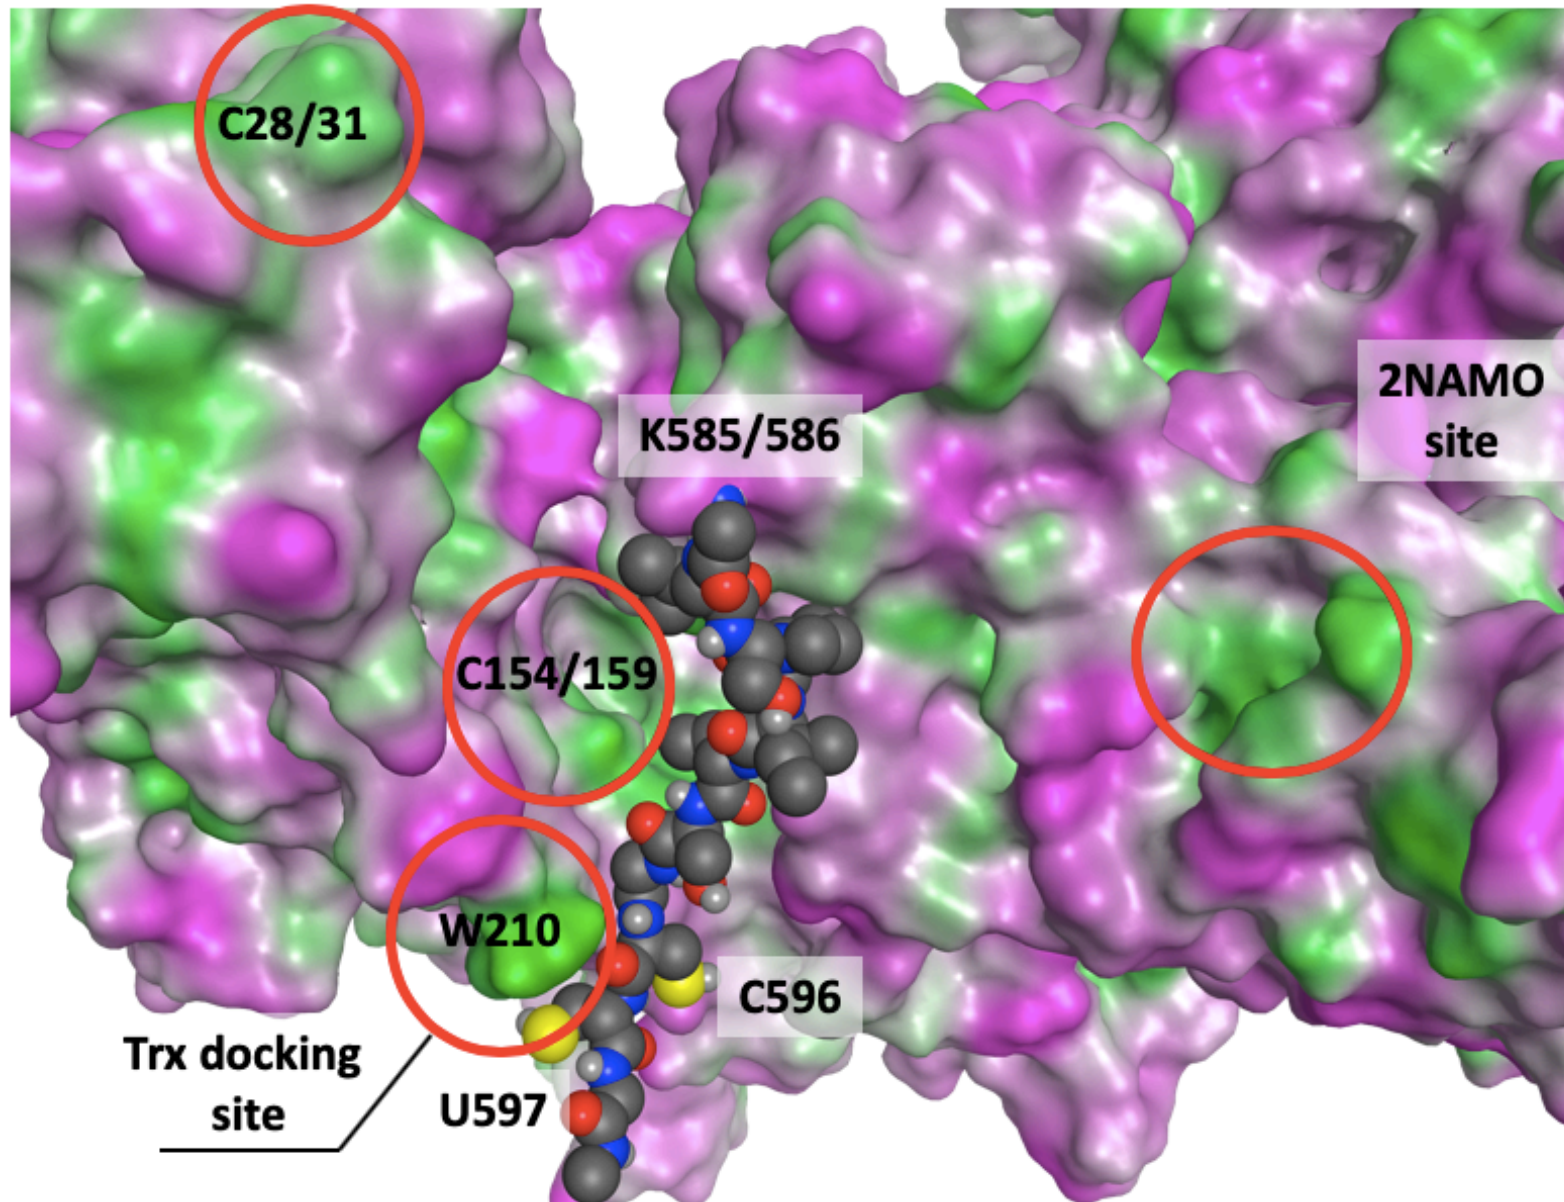

## Supplemental figure 4

Sequence alignment between SmTGR and representative homologues belonging to the FAD/NAD-linked reductase family (only residues in the range 307-375 are displayed, numbering is according to the SmTGR sequence). The analysis is limited to the amino acidic residues contributing to the binding of compound 4 (See Table1 of the main text) in SmTGR as found by the CONTACT program (CCP4 suite). SmTGR residues, within 4.5 Å from the atoms of the compound, are in red: V316, S318, L320, E330, G333, D334, E337, F343, K345; a red and blue letter is respectively used if a residue is conserved or not in the homologous proteins. The pdb IDs of each protein are indicated in parenthesis. SmTGR: Thioredoxin glutathione reductase from *Schistosoma mansoni*; SjtGR: Thioredoxin glutathione reductase from *Schistosoma japonicum*; hTrxR: thioredoxin reductase isoform I from *Homo sapiens*; RnTrxR: Rattus norvegicus Thioredoxin reductase; hsGR: glutathione reductase from *Homo sapiens*.

```

                316                330                345
                |                |                |
SmTGR (2V6O)  SLGGDVTVMVRSI-LL-RGFDQQMAEKVGDYME-N-HGVKFAKL-CVPDEIKQLKVVDTENNKPGLLLVKGHYT
SjtGR (4LA1)  SLGGDVTVMVRSI-LL-RGFDQQMAEKVGDYME-N-HGVKFAKL-CVPDEITQLKPVDTENNKPGLLLVKGHYT
HsTrxR (2J3N) GIGLDVTVMVRSI-LL-RGFDQDMANKIGEHMEE-HGIKFIRQ-FVPIKVEQI-----EAGTPGRLRVVAQST
RnTrxR (3EAN) GIGLDVTVMVRSI-LL-RGFDQDMANKIGEHMEE-HGIKFIRQ-FVPTKIEQI-----EAGTPGRLKVTAKST
HsGR (3DJG)   ALGSKTSLMIRHDKVL-RSFDISMISTNCTEELEN-AGVEVLKF-SQVKEVKKT-----LSGLEVSMVTAVPGR
```

## Supplementary references

- SmTGR (2V6O): Angelucci F, Miele AE, Boumis G, Dimastrogiovanni D, Brunori M, Bellelli A. Glutathione reductase and thioredoxin reductase at the crossroad: the structure of *Schistosoma mansoni* thioredoxin glutathione reductase. *Proteins*. (2008) 72, 936-45.
- SjtGR (4LA1): to be published
- HsTrxR (2J3N): Fritz-Wolf K, Urig S, Becker K. The structure of human thioredoxin reductase 1 provides insights into C-terminal rearrangements during catalysis. *J Mol Biol*. (2007) 370, 116-27.
- RnTrxR (3EAN): Cheng Q, Sandalova T, Lindqvist Y, Arnér ES. Crystal structure and catalysis of the selenoprotein thioredoxin reductase 1. *J Biol Chem*. (2009) 284, 3998-4008.
- HsGR (3DJG): Berkholz DS, Faber HR, Savvides SN, Karplus PA. Catalytic cycle of human glutathione reductase near 1 Å resolution. *J Mol Biol*. (2008) 382, 371-84.
